# Supplementary material for: Estimating small-area population density in Sri Lanka using surveys and Geo-spatial data
Source: PubMed Central journal article supplement (PMC7406065; doi:10.1371/journal.pone.0237063), 2020-08-05
Supplement: pone.0237063.s005.pdf [file pone.0237063.s005.pdf]

**S2 Table. Comparison with Random Forest Models**

| Geo-spatial Indicators       |                 |                 |                | Random Forest    |      |      | LASSO               |      |      |
|------------------------------|-----------------|-----------------|----------------|------------------|------|------|---------------------|------|------|
| Low-res (open)               | High-res (open) | Texture (comm.) | Object (comm.) | Out-of-bag $R^2$ | RMSE | MAE  | Out-of-sample $R^2$ | RMSE | MAE  |
| A. All sectors               |                 |                 |                |                  |      |      |                     |      |      |
| i. National sample           |                 |                 |                |                  |      |      |                     |      |      |
| ×                            |                 |                 |                | 0.767            | 1282 | 477  | 0.702               | 1463 | 563  |
|                              | ×               |                 |                | 0.783            | 1237 | 390  | 0.750               | 1323 | 459  |
| ii. 55-sub districts         |                 |                 |                |                  |      |      |                     |      |      |
| ×                            |                 |                 |                | 0.677            | 2088 | 948  | 0.677               | 1948 | 928  |
|                              | ×               |                 |                | 0.707            | 1984 | 784  | 0.710               | 1927 | 818  |
|                              |                 | ×               |                | 0.719            | 1942 | 779  | 0.755               | 1845 | 808  |
|                              |                 |                 | ×              | 0.792            | 1673 | 684  | 0.830               | 1506 | 698  |
| B. Rural/Estate              |                 |                 |                |                  |      |      |                     |      |      |
| iii. National sample         |                 |                 |                |                  |      |      |                     |      |      |
| ×                            |                 |                 |                | 0.776            | 696  | 329  | 0.726               | 788  | 375  |
|                              | ×               |                 |                | 0.832            | 601  | 246  | 0.808               | 653  | 289  |
| iv. 55-sub districts         |                 |                 |                |                  |      |      |                     |      |      |
| ×                            |                 |                 |                | 0.807            | 968  | 510  | 0.754               | 990  | 550  |
|                              | ×               |                 |                | 0.847            | 855  | 383  | 0.838               | 848  | 424  |
|                              |                 | ×               |                | 0.849            | 850  | 380  | 0.882               | 788  | 415  |
|                              |                 |                 | ×              | 0.872            | 781  | 352  | 0.869               | 747  | 355  |
| C. Urban                     |                 |                 |                |                  |      |      |                     |      |      |
| v. National sample (urban)   |                 |                 |                |                  |      |      |                     |      |      |
| ×                            |                 |                 |                | 0.598            | 3966 | 2285 | 0.540               | 4105 | 2344 |
|                              | ×               |                 |                | 0.612            | 3890 | 2079 | 0.569               | 3999 | 2343 |
| vi. 55-sub districts (urban) |                 |                 |                |                  |      |      |                     |      |      |
| ×                            |                 |                 |                | 0.424            | 3680 | 2084 | 0.511               | 3277 | 1917 |
|                              | ×               |                 |                | 0.461            | 3559 | 1888 | 0.525               | 3357 | 1909 |
|                              |                 | ×               |                | 0.491            | 3457 | 1850 | 0.668               | 2897 | 1676 |
|                              |                 |                 | ×              | 0.626            | 2984 | 1620 | 0.804               | 2226 | 1446 |

Note: Open refers to Open-source imagery, and comm. refers to commercially-procured imagery. The models use the census village population density as the dependent variable. The following independent variables were used in all models: Different types of satellite imagery sources as described in panel B in table 1, district fixed effects, a binary indicator for urban villages, and log village-area. “Low-resolution (open)” indicators refer to the low-resolution and Open-source indicators as defined in table 1 in the main text. “High-res (open)” indicators refers to all open-source based indicators, including the high-resolution imagery based indicators described in table 1. “Texture (comm.)” indicators include very high-resolution texture features based on Digital Globe from [13] as defined in table 1. “Object (comm.)” imagery refers to all open-source indicators, and commercially-procured texture indicators, and object identifiers, such as cars, roofs etc., as defined in table 1. The out-of-sample  $R^2$ , Mean Absolute Error (MAE), and Root Mean Squared Error (RMSE) for the LASSO based Poisson regression are from tables 8-10.
