# Supplementary material for: Estimating small-area population density in Sri Lanka using surveys and Geo-spatial data
Source: PubMed Central journal article supplement (PMC7406065; doi:10.1371/journal.pone.0237063), 2020-08-05
Supplement: pone.0237063.s006.pdf [file pone.0237063.s006.pdf]

**S3 Table. Accuracy of Population Density Estimates, by Training Sample Size**

| Sample Type                      | Number of Villages | In-sample    |              | Out-of-sample |      |
|----------------------------------|--------------------|--------------|--------------|---------------|------|
|                                  |                    | Pseudo $R^2$ | Pseudo $R^2$ | MAE           | RMSE |
| Medium sample                    | 1178               | 0.918        | 0.842        | 1490          | 712  |
| Small sample (50% of medium)     | 593                | 0.908        | 0.843        | 1447          | 698  |
| Very small sample (50% of small) | 292                | 0.920        | 0.832        | 1691          | 738  |

Note: The results are based on a Poisson regression model whose dependent variable is census village population density, and the independent variables are selected based on LASSO regularization among the following: All open-source and commercially-procured imagery sources as described in panel B in Table 1, sectoral and district fixed effects, and log village-area. The out-of sample  $R^2$  is obtained from stata's crossfold command using five-fold cross-validation. MAE refers to mean absolute error and RMSE refers to Root Mean Squared Error.
