# Supplementary material for: Estimating small-area population density in Sri Lanka using surveys and Geo-spatial data
Source: PubMed Central journal article supplement (PMC7406065; doi:10.1371/journal.pone.0237063), 2020-08-05
Supplement: pone.0237063.s007.pdf [file pone.0237063.s007.pdf]

**S4 Table. Out-of-sample Accuracy of HIES-based Village Population Count Estimates, 55 Sub-Districts**

|                                                                                      | $R^2$ | SRC  | Mean<br>AE | Median<br>RE | Median<br>RE |
|--------------------------------------------------------------------------------------|-------|------|------------|--------------|--------------|
| <i>A. Model estimates, Open-source &amp; Commercially-procured satellite imagery</i> |       |      |            |              |              |
| HIES-based                                                                           | 0.26  | 0.51 | 642        | 42%          | 30%          |
| HIES-based (with balance correction)                                                 | 0.24  | 0.49 | 641        | 42%          | 31%          |
| Census-based                                                                         | 0.28  | 0.36 | 694        | 58%          | 32%          |
| <i>B. Model estimates, Open-source satellite imagery</i>                             |       |      |            |              |              |
| HIES-based                                                                           | 0.23  | 0.33 | 668        | 42%          | 30%          |
| HIES-based (with balance correction)                                                 | 0.23  | 0.34 | 666        | 42%          | 30%          |
| Census-based                                                                         | 0.25  | 0.28 | 792        | 57%          | 31%          |

Note: Note: HIES=the Household Income and Expenditure Survey; GPW=Gridded Population of the World; GHSL=Global Human Settlement Layer; GUF= Global Urban Footprint; AE= Absolute; RE=Relative Error; SRC=Spearman Rank Correlation. We retain only the 1,178 villages in the 55 sub-districts for which the commercially-available data were obtained. The model is estimated using population count as the dependent variable on sub-sample of 414 villages covered in 2012-2013 HIES survey. All models include district fixed effects, urban-area dummy, and log village area. Out-of-sample estimates for testing the accuracy with the census are obtained on 946 villages not covered in the HIES. The weights for the HIES-based model are  $\frac{1}{Pop_v}$ . The balanced corrected weights are  $\frac{1}{(PopXIN_v)}$ .
